# Supplementary material for: On-line pseudo-stationary magnetic solid-phase extraction using magnetic cation exchange microparticles and its application to the determination of strontium
Source: Royal Society of Chemistry journal article supplement (doi:10.1039/c8ja00088c), 2018-01-01
Supplement: c8ja00088c1.pdf [file c8ja00088c1.pdf]

**Electronic Supporting Information (ESI) of *J. Anal. At. Spec.***

Technical Notes

On-line Pseudo-stationary Magnetic Solid-phase Extraction using Magnetic Cation Exchange Microparticles and Its Application to the Determination of Strontium

Alejandro AYALA and Yoshitaka TAKAGAI<sup>†</sup>

*Faculty of Symbiotic Systems Science, Fukushima University, 1 Kanayagawa, Fukushima, Fukushima 960-1296, Japan*

---

<sup>†</sup> To whom correspondence should be addressed.

E-mail: s015@ipc.fukushima-u.ac.jp

Table S1 Instruction sequence of magnetic particles set-up into the reaction coil

| Step | Position |    |     | Action   | Flow rate/<br>mL min <sup>-1</sup> | Volume/<br>mL | Description                                          |
|------|----------|----|-----|----------|------------------------------------|---------------|------------------------------------------------------|
|      | SPV      | SV | SWV |          |                                    |               |                                                      |
| 1    | Left     | 1  | 1   | Aspirate | 50                                 | 15.0          | Aspiration of water                                  |
| 2    | Right    | 8  | 1   | Aspirate | 20                                 | 0.4           | Aspiration of magnetic particles (approx. 20 mg)     |
| 3    | Right    | 3  | 1   | Dispense | 20                                 | 0.4           | Positioning of magnetic particles into reaction coil |
| 4    | Right    | 3  | 1   | Wait     | 0                                  | 0.0           | Placing of magnets onto reaction coil                |
| 5    | Right    | 3  | 1   | Dispense | 1                                  | 10.0          | Removal of not-retained magnetic particles           |
| 6    | Right    | 2  | 1   | Dispense | 5                                  | 1.0           | Cleaning of loading coil                             |

a. Acronyms (SPV, SV, SWV) as in Fig. 1.

Table S2 Instruction sequence of the analytical method for strontium determination

| Step | Position |    |     | Action   | Flow rate/<br>mL min <sup>-1</sup> | Volume/<br>mL | Description                                                               |
|------|----------|----|-----|----------|------------------------------------|---------------|---------------------------------------------------------------------------|
|      | SPV      | SV | SWV |          |                                    |               |                                                                           |
| 1    | Left     | 1  | 1   | Aspirate | 50                                 | 4.0           | Aspiration of water                                                       |
| 2    | Right    | 7  | 1   | Aspirate | 20                                 | 0.5           | Aspiration of HNO <sub>3</sub>                                            |
| 3    | Right    | 3  | 1   | Dispense | 1                                  | 0.5           | Conditioning of magnetic particles                                        |
| 4    | Right    | 6  | 1   | Aspirate | 20                                 | 1.0           | Aspiration of sample                                                      |
| 5    | Right    | 3  | 1   | Dispense | 1                                  | 1.4           | Pre-concentration of sample and rinse with water                          |
| 6    | Right    | 7  | 1   | Aspirate | 20                                 | 0.5           | Aspiration of HNO <sub>3</sub>                                            |
| 7    | Right    | 3  | 1   | Dispense | 1                                  | 0.8           | Elution and positioning of eluted sample up to loading coil               |
| 8    | Right    | 3  | 2   | Dispense | 1                                  | 1.0           | Injection of eluted sample into MP-AES and cleaning of magnetic particles |
| 9    | Right    | 2  | 1   | Dispense | 5                                  | 1.0           | Cleaning of loading coil                                                  |

a. Acronyms (SPV, SV, SWV) as in Fig. 1.

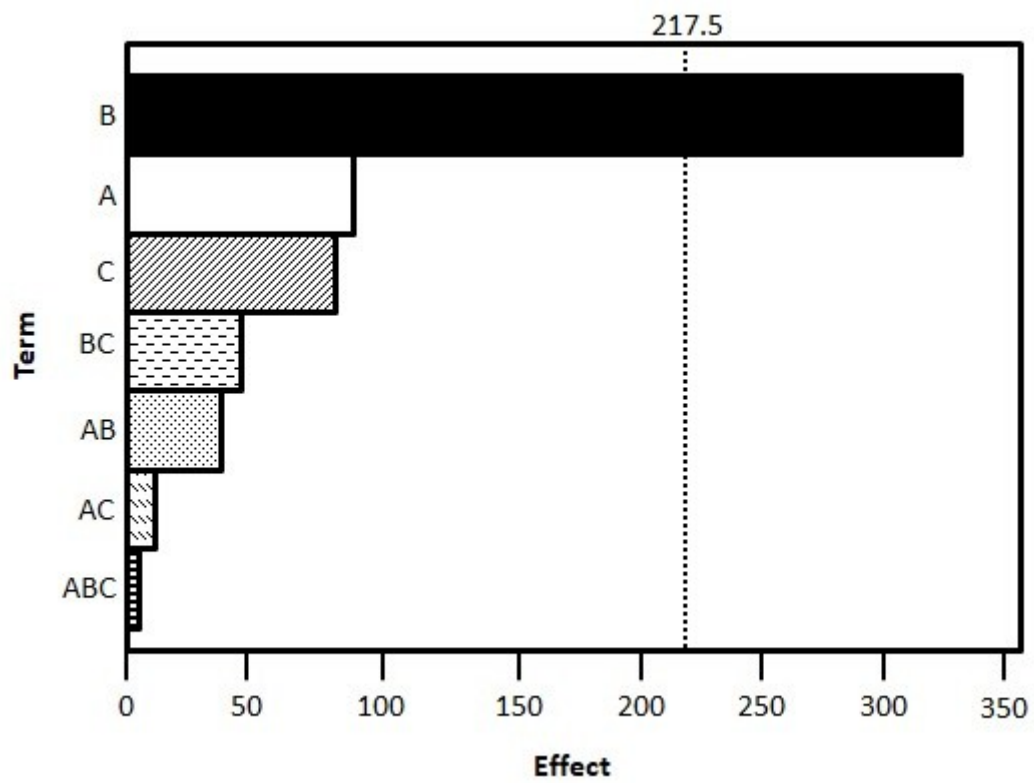

Fig. S1 An illustration of the Pareto chart showing the effects of the observed variables obtained by the statistical software. A, HNO<sub>3</sub> concentration; B, Volume of sample; C, pH.
